# Supplementary material
Source: PubMed Central journal article supplement (PMC6761588)
Supplement: Supp_Fig1.pdf [file Supp_Fig1.pdf]

## Supplementary Data

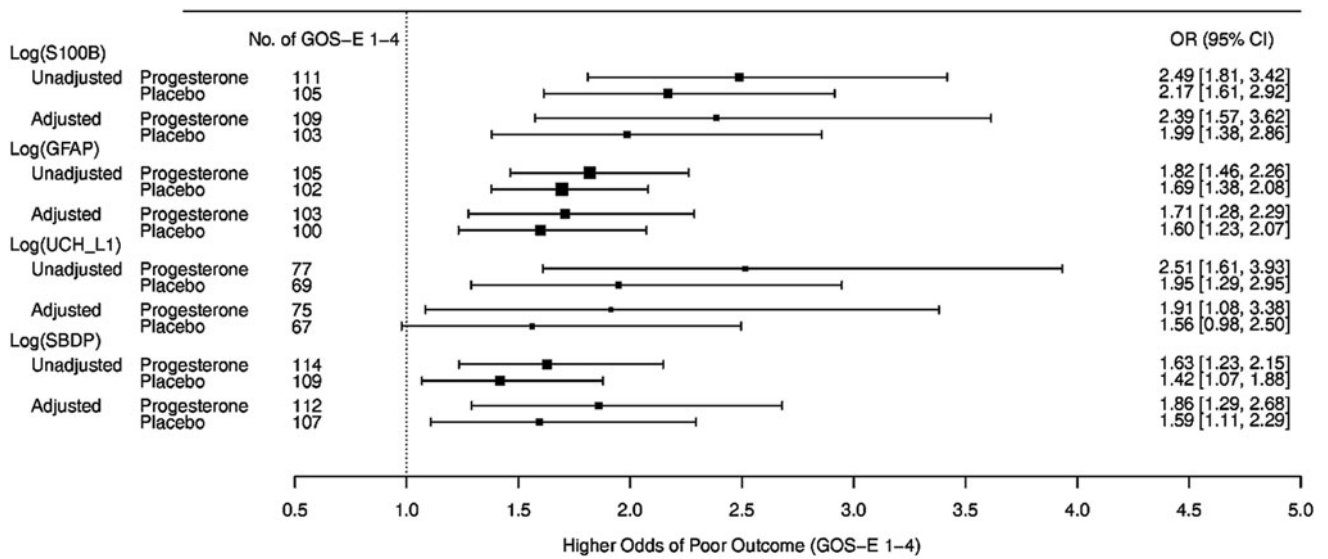

**SUPPLEMENTARY FIG. 1.** Forest plot depicting the unadjusted and adjusted association between individual biomarkers and unfavorable outcome (Glasgow Outcome Scale-Extended [GOS-E] 1-4) within each treatment arm. The adjusted association includes age, gender, Rotterdam computed tomography (CT) score, and Glasgow Coma Scale (GCS) score.
