# Supplementary material
Source: PubMed Central journal article supplement (PMC6761588)
Supplement: Supp_Fig2.pdf [file Supp_Fig2.pdf]

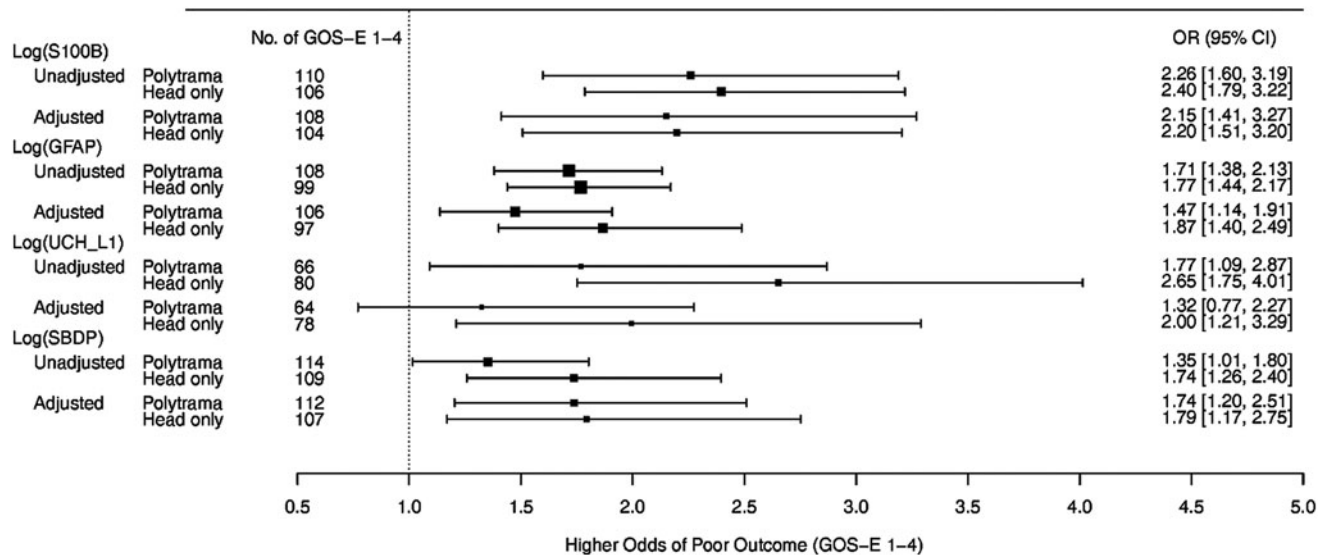

**SUPPLEMENTARY FIG. 2.** Forest plot depicting the unadjusted and adjusted association between individual biomarkers and unfavorable outcome (Glasgow Outcome Scale-Extended [GOS-E] 1-4) within subgroups defined by polytrauma. The adjusted association includes age, gender, Rotterdam CT score, and GCS.
